# Supplementary material for: Delivering patient decision aids on the Internet: definitions, theories, current evidence, and emerging research areas
Source: PubMed Central journal article supplement (PMC4043476; doi:10.1186/1472-6947-13-s2-s13), 2013-11-29
Supplement: 1472-6947-13-S2-S13-S2.pdf [file 1472-6947-13-S2-S13-S2.pdf]

**Table S2. Emerging Studies of Internet-delivered PtDAs [1-8]: Studies Conducted Since the Most Recent (2011) Cochrane Collaboration Review [9]**

| <b>Author,<br/>Year,<br/>Reference<br/>Number</b> | <b>Clinical<br/>Context</b>            | <b>Study<br/>Design</b>                                                                                                                                                  | <b>Primary<br/>Results</b>                                                                                                                                                                                                                                                                                                                          |
|---------------------------------------------------|----------------------------------------|--------------------------------------------------------------------------------------------------------------------------------------------------------------------------|-----------------------------------------------------------------------------------------------------------------------------------------------------------------------------------------------------------------------------------------------------------------------------------------------------------------------------------------------------|
| Li, 2012,<br>[1]                                  | Rheumatoid<br>arthritis                | Development & field<br>test, n = 15, of<br>ANSWER interactive<br>website PtDA                                                                                            | <ul style="list-style-type: none"> <li>- Positive usability scores</li> <li>- Acceptable viewing time</li> <li>“Think Aloud” analysis yielded 3<br/>themes:</li> <li>- User engagement</li> <li>- Information quality</li> <li>- User interaction</li> </ul>                                                                                        |
| Joseph-<br>Williams,<br>2010, [2]                 | PSA screening                          | Observational study,<br>n = 82, usage data<br>examined for<br>associations between<br>Prosdex usage and<br>components of<br>informed decision<br>making                  | <p>Increased Prosdex usage was<br/>significantly associated with:</p> <ul style="list-style-type: none"> <li>- Increased knowledge</li> <li>- Decreased favorable attitude about<br/>PSA testing</li> <li>- Reduced intention to undergo PSA<br/>testing</li> </ul>                                                                                 |
| Evans,<br>2010, [3]                               | PSA screening                          | RCT, n = 514,<br>randomized to 4<br>groups: viewing<br>Prosdex website in<br>location of their choice<br>vs. paper version, with<br>baseline questionnaire<br>or without | <p>Compared to control, viewing<br/>Prosdex:</p> <ul style="list-style-type: none"> <li>- Increased knowledge scores</li> <li>- Decreased favorable attitude about<br/>PSA screening</li> <li>- Decreased screening</li> <li>- Decreased decisional conflict</li> </ul> <p>Prosdex outcomes did not differ<br/>significantly with paper version</p> |
| Miller,<br>2011, [4]                              | Colorectal<br>cancer                   | RCT, n = 264,<br>randomized to<br>CHOICE, an Internet-<br>delivered video, versus<br>control video                                                                       | <p>CHOICE video group reported:</p> <ul style="list-style-type: none"> <li>- Increased post-intervention<br/>preference</li> <li>- Increased readiness to receive<br/>screening</li> </ul>                                                                                                                                                          |
| Simon,<br>2012, [5]                               | Depression &<br>acute low back<br>pain | RCT, n = 131,<br>randomized to tailored<br>Patient Dialogue<br>website or static patient<br>information                                                                  | <p>Patient Dialogue group reported:</p> <ul style="list-style-type: none"> <li>- Lower decisional conflict scores</li> <li>- Higher preparation for decision<br/>making scores</li> </ul>                                                                                                                                                           |

---

|                    |                       |                                                                                                                                                                                                                                              |                                                                                                                                                                                                                                                                                                                                                                                                                                                                                                                                                                                            |
|--------------------|-----------------------|----------------------------------------------------------------------------------------------------------------------------------------------------------------------------------------------------------------------------------------------|--------------------------------------------------------------------------------------------------------------------------------------------------------------------------------------------------------------------------------------------------------------------------------------------------------------------------------------------------------------------------------------------------------------------------------------------------------------------------------------------------------------------------------------------------------------------------------------------|
| Hoffman, 2012, [6] | Knee osteoarthritis   | Development and field test, n = 126, of interactive, step-wise, tailored Internet PtDA, compared to usual care (with video PtDA)                                                                                                             | Development model integrated decision support and informatics methods<br>Internet PtDA group reported: <ul style="list-style-type: none"> <li>- Knowledge scores and usability scores above usual care</li> <li>- 100% preference to view PtDA on home/public computer</li> <li>- Higher preparation and self-efficacy scores</li> <li>- Lower decisional conflict scores</li> </ul>                                                                                                                                                                                                       |
| Sivell, 2012, [7]  | Breast cancer surgery | Observational cohort study, n = 54, evaluating use of BresDex, based on collected web-log data of components accessed and time spent, overall and on each component                                                                          | <ul style="list-style-type: none"> <li>- Using BresDex increased readiness to make surgery decision</li> <li>- More time spent on BresDex was associated with stronger intentions to have surgery and lower pre-intervention readiness to make a surgery decision</li> <li>- Surgery intentions and choices were significantly related</li> <li>- Majority of participants went on to have surgery</li> </ul>                                                                                                                                                                              |
| Durand, 2012, [8]  | Amniocentesis         | Development of two deliberation components for AmnioDex, a graphic, interactive, web-based PtDA based on “Take the Best” heuristics and integration algorithm. Evaluation, n = 48, by researchers, healthcare providers, and pregnant women. | <p>Researchers reported that the tools:</p> <ul style="list-style-type: none"> <li>- Were useful in facilitating decision making</li> <li>- Need simple instructions, clear layouts</li> </ul> <p>Health-care providers expressed concerns regarding the usability and clarity of the tools</p> <p>Pregnant women found the tools useful in:</p> <ul style="list-style-type: none"> <li>- Weighing pros and cons</li> <li>- Clarifying their thoughts</li> <li>- Visualizing their decision efforts</li> <li>- Potentially inappropriate for this difficult, emotional decision</li> </ul> |

---

## References

- [1] Li LC, Townsend AF, Badley EM: **Self-management interventions in the digital age: New approaches to support people with rheumatologic conditions.** *Best Pract Res Clin Rheumatol* 2012, **26**:321-333.
- [2] Joseph-Williams N, Evans R, Edwards A, Newcombe RG, Wright P, Grol R, Elwyn G: **Supporting informed decision making online in 20 minutes: an observational web-log study of a PSA test decision aid.** *J Med Internet Res* 2010, **12**:e15.
- [3] Evans R, Joseph-Williams N, Edwards A, Newcombe RG, Wright P, Kinnersley P, Griffiths J, Jones M, Williams J, Grol R *et al*: **Supporting informed decision making for prostate specific antigen (PSA) testing on the web: an online randomized controlled trial.** *J Med Internet Res* 2010, **12**:e27.
- [4] Miller DP, Jr., Spangler JG, Case LD, Goff DC, Jr., Singh S, Pignone MP: **Effectiveness of a web-based colorectal cancer screening patient decision aid: a randomized controlled trial in a mixed-literacy population.** *Am J Prev Med* 2011, **40**:608-615.
- [5] Simon D, Kriston L, von Wolff A, Buchholz A, Vietor C, Hecke T, Loh A, Zenker M, Weiss M, Harter M: **Effectiveness of a web-based, individually tailored decision aid for depression or acute low back pain: a randomized controlled trial.** *Patient Educ Couns* 2012, **87**:360-368.
- [6] Hoffman AS, Llewellyn-Thomas HA, Tosteson ANA, O'Connor AM, Volk RJ, Tomek I, Bartels SJ, Andrews SA: **Development of an Internet-based patients' decision aid for surgical versus nonsurgical management of knee osteoarthritis.** [abstract] The 34th Annual Meeting of the Society for Medical Decision Making; 2012.  
[\[http://smdm.confex.com/smdm/2012az/webprogram/Session1601.html\]](http://smdm.confex.com/smdm/2012az/webprogram/Session1601.html)

- [7] Sivell S, Edwards A, Manstead AS, Reed MW, Caldon L, Collins K, Clements A, Elwyn G: **Increasing readiness to decide and strengthening behavioral intentions: evaluating the impact of a web-based patient decision aid for breast cancer treatment options (BresDex: [www.bresdex.com](http://www.bresdex.com))**. *Patient Educ Couns* 2012, **88**:209-217.
- [8] Durand MA, Wegwarth O, Boivin J, Elwyn G: **Design and usability of heuristic-based deliberation tools for women facing amniocentesis**. *Health Expect* 2012, **15**:32-48.
- [9] Stacey D, Bennet CL, Barry MJ, Col NF, Eden KB, Holmes-Rovner M, Llewellyn-Thomas HA, Lyddiatt A, Légaré F, Thomsson R: **Decision aids for people facing health treatment or screening decisions**. *Cochrane Database of Syst Rev* 2011.
